# Supplementary material for: Quantum dot-to-dye-based fluorescent ratiometric immunoassay for GFAP: a biomarker for ischaemic stroke and glioblastoma multiforme
Source: Royal Society of Chemistry journal article supplement (doi:10.1039/d4an01292e), 2024-12-04
Supplement: d4an01292e1.pdf [file d4an01292e1.pdf]

**-Supporting Information-**

**Quantum Dot to Dye Based Fluorescent Ratiometric Immunoassay for an Ischaemic Stroke Biomarker; Glial Fibrillary Acidic Protein**

Susan Varghese<sup>1</sup>, Anju S. Madanan<sup>1</sup>, Merin K. Abraham<sup>1</sup>, Ali Ibrahim Shkhair<sup>1±</sup>, Geneva Indongo<sup>1</sup>, Greeshma Rajeevan<sup>1</sup>, Arathy B. K<sup>1</sup>, Dr. Sony George<sup>2#\*</sup>

<sup>1</sup>Department of Chemistry, School of Physical and Mathematical Sciences, University of Kerala, Kariavattom campus, Thiruvananthapuram-695581, Kerala, India.

<sup>±</sup>College of Food Science, Al-Qasim Green University, Babylon 51013, Iraq

<sup>2</sup>Associate Professor, Department of Chemistry, School of Physical and Mathematical Sciences, University of Kerala, Kariavattom campus, Thiruvananthapuram-695581, Kerala, India.

<sup>#</sup>Coordinator, International Inter University Centre for Sensing and Imaging (IIUCSI), Department of Chemistry, University of Kerala, Kariavattom campus, Thiruvananthapuram-695581, Kerala, India.

\*Corresponding Author

**Mob:** +91-9446462933

**Email:** [emailtosony@gmail.com](mailto:emailtosony@gmail.com)

**ORCID** Sony George <https://orcid.org/0000-0002-9848-0465>

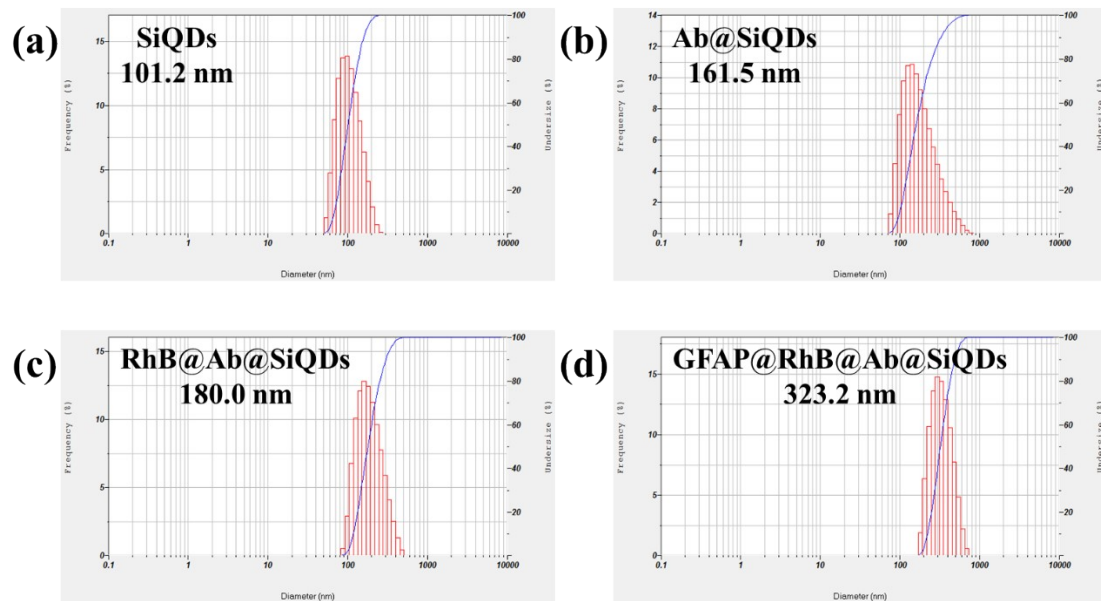

Figure S1. DLS spectrum of (a) SiQDs; (b) Ab@SiQDs; (c) RhB@Ab@SiQDs and (d) GFAP@RhB@Ab@SiQDs

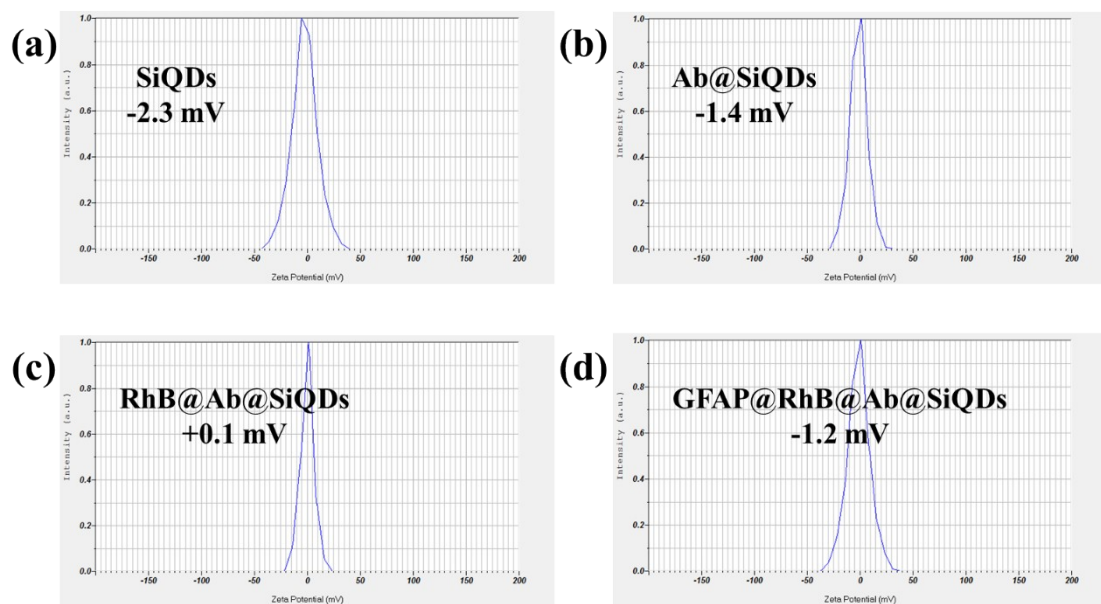

Figure S2. Zeta potential graph of (a) SiQDs; (b) Ab@SiQDs; (c) RhB@Ab@SiQDs and (d) GFAP@RhB@Ab@SiQDs

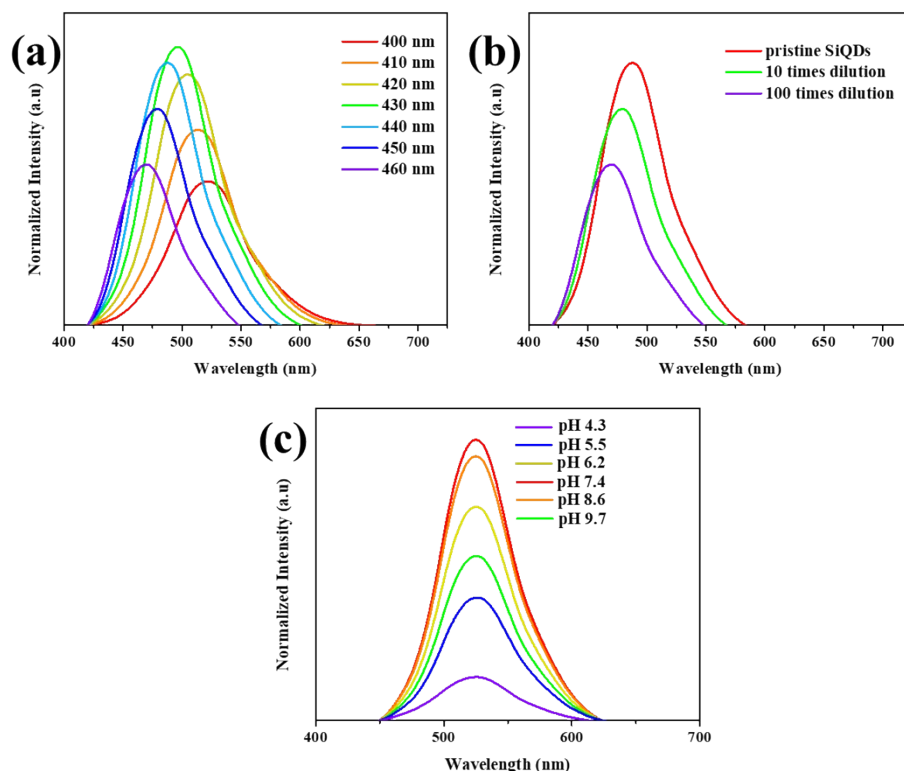

Figure S3. (a) Photoluminescence spectra of SiQDs at various excitation wavelengths (410 nm, 420 nm, 430 nm, 440 nm, 450 nm and 460 nm); (b) Photoluminescence spectra of SiQDs at varying dilution (pristine SiQDs, 10 times diluted SiQDs and 100 times diluted SiQDs); (c) Photoluminescence spectra of SiQDs at varying pH (4.3, 5.5, 6.2, 7.4, 8.6 and 9.7)

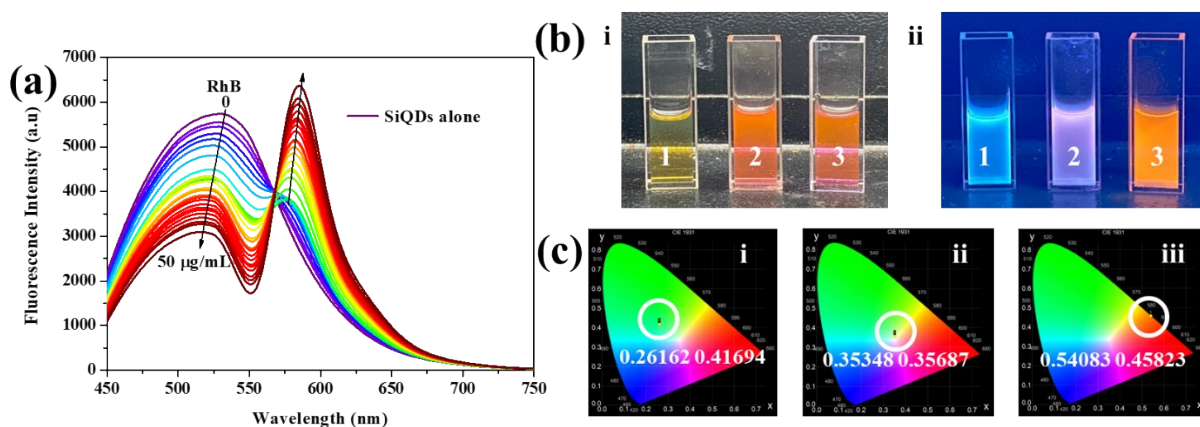

Figure S4. (a) Fluorescence emission spectrum of SiQDs upon incremental addition of RhB; (b) Photographs of 1. SiQDs, 2. SiQDs+RhB, 3. RhB under (i) daylight and (ii) UV light; (c) Chromaticity plot of (i) SiQDs, (ii) SiQDs+RhB and (iii) RhB
